# Supplementary material
Source: PubMed Central journal article supplement (PMC7054832)
Supplement: jama-323-844-s001.pdf [file jama-323-844-s001.pdf]

## Supplementary Online Content

Wouters OJ, McKee M, Luyten J. Estimated research and development investment needed to bring a new medicine to market, 2009-2018. *JAMA*. doi:10.1001/jama.2020.1166

**eTable 1.** Characteristics of Therapeutic Agents Included in the Analysis

**eTable 2.** Quality Score of the Research and Development Estimate for Each Therapeutic Agent

**eTable 3.** Median Research and Development Outlays (2018 US \$, Millions) by Product Category, Without Adjustment for Costs of Failures

**eTable 4.** Research and Development Costs (2018 US \$, Millions), Broken Down by Phase of Clinical Development, for All Therapeutic Agents Included in the Analysis

**eTable 5.** Dates of Clinical Trial Phase Changes for All Therapeutic Agents Included in the Analysis

**eTable 6.** Estimated Research and Development Costs (2018 US \$, Millions) for All Therapeutic Agents Included in the Analysis

This supplementary material has been provided by the authors to give readers additional information about their work.

## Appendix 1: Breakdown of results for the 63 therapeutic agents included in the analysis.

**eTable 1.** Characteristics of Therapeutic Agents Included in the Analysis

| Brand name | Generic name             | Manufacturer <sup>a</sup>       | Route <sup>b</sup> | Type | ATC <sup>c</sup> | FIC | OR | FT | BT | PR | AA |
|------------|--------------------------|---------------------------------|--------------------|------|------------------|-----|----|----|----|----|----|
| Adcetris   | brentuximab vedotin      | Seattle Genetics                | injection          | BLA  | L                | 1   | 1  | 1  |    | 1  | 1  |
| Alunbrig   | brigatinib               | Ariad Pharmaceuticals           | oral               | NDA  | L                |     | 1  |    | 1  | 1  | 1  |
| Aristada   | aripiprazole lauroxil    | Alkermes Inc.                   | injection          | NDA  | N                |     |    |    |    |    |    |
| Beleodaq   | belinostat               | Spectrum Pharmaceuticals        | intravenous        | NDA  | L                |     | 1  | 1  |    | 1  | 1  |
| Belviq     | lorcaserin hydrochloride | Arena Pharmaceuticals Inc.      | oral               | NDA  | A                | 1   |    |    |    |    |    |
| Brineura   | cerliponase alfa         | Biomarin Pharmaceuticals        | injection          | BLA  | A                | 1   | 1  |    | 1  | 1  |    |
| Copiktra   | duvelisib                | Infinity Pharmaceuticals        | oral               | NDA  | L                |     | 1  | 1  |    | 1  | 1  |
| Crysvita   | burosumab-twza           | Ultragenyx Pharmaceuticals Inc. | injection          | BLA  | M                | 1   | 1  | 1  | 1  | 1  |    |
| Dificid    | fidaxomicin              | Optimer Pharmaceuticals Inc.    | oral               | NDA  | A                |     |    | 1  |    | 1  |    |
| Dupilixent | dupilumab                | Regeneron Pharmaceuticals       | injection          | BLA  | D                | 1   |    |    | 1  | 1  |    |
| Elzonris   | tagraxofusp-erzs         | Stemline Therapeutics Inc.      | injection          | BLA  | L                | 1   | 1  |    | 1  | 1  |    |
| Eucrisa    | crisaborole              | Anacor Pharmaceuticals Inc.     | other              | NDA  | D                |     |    |    |    |    |    |
| Exondys 51 | eteplirsen               | Sarepta Therapeutics Inc.       | intravenous        | NDA  | M                | 1   | 1  | 1  |    | 1  | 1  |
| Eylea      | aflibercept              | Regeneron Pharmaceuticals       | injection          | BLA  | S                |     |    |    |    | 1  |    |
| Fanapt     | iloperidone              | Vanda Pharmaceuticals, Inc.     | oral               | NDA  | N                |     |    |    |    |    |    |
| Firdapse   | amifampridine            | Catalyst Pharms                 | oral               | NDA  | N                |     | 1  |    | 1  | 1  |    |
| Folotyng   | pralatrexate             | Allos Therapeutics Inc.         | intravenous        | NDA  | L                |     | 1  |    |    | 1  | 1  |
| Galafold   | migalastat               | Amicus Therapeutics US          | oral               | NDA  | A                | 1   | 1  | 1  |    | 1  | 1  |
| Gattex     | teduglutide              | NPS Pharms Inc.                 | injection          | NDA  | A                | 1   | 1  |    |    |    |    |
| Hetlioz    | tasimelteon              | Vanda Pharmaceuticals, Inc.     | oral               | NDA  | N                |     | 1  |    |    | 1  |    |
| Iclusig    | ponatinib                | Ariad Pharmaceuticals           | oral               | NDA  | L                |     | 1  | 1  |    | 1  | 1  |
| Idhifa     | enasidenib               | Agios Pharms Inc.               | oral               | NDA  | L                | 1   | 1  | 1  |    | 1  |    |
| Imbruvica  | ibrutinib                | Pharmacyclics Inc.              | oral               | NDA  | L                | 1   | 1  | 1  | 1  | 1  | 1  |

| Brand name | Generic name            | Manufacturer <sup>a</sup>       | Route <sup>b</sup> | Type | ATC <sup>c</sup> | FIC | OR | FT | BT | PR | AA |
|------------|-------------------------|---------------------------------|--------------------|------|------------------|-----|----|----|----|----|----|
| Ingrezza   | valbenazine             | Neurocrine Biosciences          | oral               | NDA  | N                |     |    | 1  | 1  | 1  |    |
| Juxtapid   | lomitapide              | Aegerion Pharmaceuticals        | oral               | NDA  | C                | 1   | 1  |    |    |    |    |
| Kalbitor   | ecallantide             | Dyax Corp                       | injection          | BLA  | B                | 1   | 1  |    |    | 1  |    |
| Kengreal   | cangrelor               | The Medicines Company           | intravenous        | NDA  | B                |     |    |    |    |    |    |
| Kerydin    | tavorole                | Anacor Pharmaceuticals Inc.     | other              | NDA  | D                | 1   |    |    |    |    |    |
| Kevzara    | sarilumab               | Regeneron Pharmaceuticals       | injection          | BLA  | L                |     |    |    |    |    |    |
| Kybella    | deoxycholic acid        | Kythera Biopharms               | injection          | NDA  | D                |     |    |    |    |    |    |
| Kyprolis   | carfilzomib             | Onyx Therapeutics               | intravenous        | NDA  | L                |     | 1  | 1  |    |    | 1  |
| Libtayo    | cemiplimab-rwlc         | Regeneron Pharmaceuticals       | intravenous        | BLA  | L                |     |    |    | 1  | 1  |    |
| Linzess    | linaclotide             | Ironwood Pharmaceuticals        | oral               | NDA  | A                | 1   |    |    |    |    |    |
| Mepsevii   | vestronidase alfa-vjbjk | Ultragenyx Pharmaceuticals Inc. | injection          | BLA  | A                | 1   | 1  | 1  |    | 1  |    |
| Mytesi     | crofelemer              | Salix Pharmaceuticals Inc.      | oral               | NDA  | A                | 1   |    | 1  |    | 1  |    |
| Northera   | droxidopa               | Chelsea Therapeutics            | oral               | NDA  | C                | 1   | 1  | 1  |    | 1  | 1  |
| Nuplazid   | pimavanserin            | Acadia Pharms Inc.              | oral               | NDA  | N                |     |    |    | 1  | 1  |    |
| Nuzyra     | omadacycline            | Paratek Pharmaceuticals Inc.    | other              | NDA  | J                |     |    | 1  |    | 1  |    |
| Ocaliva    | obeticholic acid        | Intercept Pharms Inc.           | oral               | NDA  | A                | 1   | 1  | 1  |    | 1  | 1  |
| Orbactiv   | oritavancin             | The Medicines Company           | intravenous        | NDA  | J                |     |    |    |    | 1  |    |
| Palynziq   | pegvaliase-pqpz         | Biomarin Pharmaceuticals        | injection          | BLA  | A                | 1   | 1  | 1  |    | 1  |    |
| Praluent   | alirocumab              | Regeneron Pharmaceuticals       | injection          | BLA  | C                | 1   |    |    |    |    |    |
| Rapivab    | peramivir               | BioCryst Pharmaceuticals        | intravenous        | NDA  | J                |     |    | 1  |    |    |    |
| Rhopressa  | netarsudil              | Aerie Pharmaceuticals, Inc.     | other              | NDA  | S                | 1   |    |    |    |    |    |
| Rubraca    | rucaparib               | Clovis Oncology Inc.            | oral               | NDA  | L                |     | 1  |    | 1  | 1  | 1  |
| Strensiq   | asfotase alfa           | Alexion Pharmaceuticals         | injection          | BLA  | A                | 1   | 1  | 1  | 1  | 1  |    |
| Talzenna   | talazoparib             | Biomarin Pharmaceuticals        | oral               | NDA  | L                |     |    |    |    | 1  |    |
| Tegsedi    | inotersen               | Ionis Pharms Inc.               | injection          | NDA  | N                | 1   | 1  | 1  |    | 1  |    |
| Tibsovo    | ivosidenib              | Agios Pharms Inc.               | oral               | NDA  | L                | 1   | 1  | 1  |    | 1  |    |

| Brand name | Generic name                  | Manufacturer <sup>a</sup>   | Route <sup>b</sup> | Type | ATC <sup>c</sup> | FIC | OR | FT | BT | PR | AA |
|------------|-------------------------------|-----------------------------|--------------------|------|------------------|-----|----|----|----|----|----|
| Trulance   | plecanatide                   | Synergy Pharmaceuticals     | oral               | NDA  | A                |     |    |    |    |    |    |
| Tymlos     | abaloparatide                 | Radius Health Inc.          | injection          | NDA  | M                |     |    |    |    |    |    |
| Ultomiris  | ravulizumab                   | Alexion Pharmaceuticals     | injection          | BLA  | L                |     | 1  |    |    |    |    |
| Varubi     | rolapitant                    | Tesaro Inc.                 | other              | NDA  | A                |     |    |    |    |    |    |
| Veltassa   | patiromer for oral suspension | Relypsa Inc.                | oral               | NDA  | V                |     |    |    |    |    |    |
| Viberzi    | eluxadoline                   | Furiex Pharmaceuticals Inc. | oral               | NDA  | A                |     |    | 1  |    | 1  |    |
| Viibryd    | vilazodone hydrochloride      | Clinical Data Inc.          | oral               | NDA  | N                |     |    |    |    |    |    |
| Vimizim    | elosulfase alfa               | Biomarin Pharmaceuticals    | injection          | BLA  | A                | 1   | 1  | 1  |    | 1  |    |
| Vitrakvi   | larotrectinib                 | Loxo Oncology Inc.          | oral               | NDA  | L                | 1   | 1  |    | 1  | 1  | 1  |
| Xerava     | eravacycline                  | Tetraphase Pharms           | intravenous        | NDA  | J                |     |    | 1  |    | 1  |    |
| Xtandi     | enzalutamide                  | Medivation Inc.             | oral               | NDA  | L                |     |    | 1  |    | 1  |    |
| Zaltrap    | ziv-aflibercept               | Regeneron Pharmaceuticals   | injection          | BLA  | L                |     |    |    |    | 1  |    |
| Zejula     | niraparib                     | Tesaro Inc.                 | oral               | NDA  | L                |     | 1  | 1  | 1  | 1  |    |
| Zerbaxa    | ceftolozane/tazobactam        | Cubist Pharmaceuticals LLC  | intravenous        | NDA  | J                |     |    | 1  |    | 1  |    |

**Acronyms:** AA, accelerated approval; ATC, anatomical therapeutic chemical (classification system); BLA, biologics license application; BT, break-through therapy; FIC, first in class; FT, fast track; NDA, new drug application; OR, orphan drug; PR, priority review.

<sup>a</sup> This is the firm that reported research and development (R&D) expenses for the therapeutic agent in question in the US Securities and Exchange filings used to produce our estimates. In almost all cases, this was the manufacturer listed on the BLA or NDA approval issued by the Food and Drug Administration (FDA).

<sup>b</sup> Injection included intramuscular and subcutaneous; other routes included multiple, ophthalmic, and topical.

<sup>c</sup> The anatomical therapeutic chemical classification system codes correspond to “alimentary tract and metabolism” (A), “blood and blood forming organs” (B), “cardiovascular system” (C), “dermatologicals” (D), “anti-infectives for systemic use” (J), “antineoplastic and immune-modulating agents” (L), “musculo-skeletal system” (M), “nervous system” (N), “sensory organs” (S), and “various” (V).

**eTable 2.** Quality Score of the Research and Development Estimate for Each Therapeutic Agent

| Brand name | R&D estimate quality | Comments                                                                                                                                                                                                                                                                               |
|------------|----------------------|----------------------------------------------------------------------------------------------------------------------------------------------------------------------------------------------------------------------------------------------------------------------------------------|
| Adcetris   | medium               | There was a co-development and marketing deal with Millennium in 2009/2010 (approval in 2011). In 1998, they licensed in the product from Bristol-Myers Squibb.                                                                                                                        |
| Alunbrig   | high                 | We were able to track costs since inception, with the exception of the final 3 quarters due missing SEC filings (we extrapolated). The product was discovered internally with pre-clinical costs reported.                                                                             |
| Aristada   | high                 | We were able to track costs since inception.                                                                                                                                                                                                                                           |
| Beleodaq   | low                  | They licensed the product from TopoTarget in phase 3 of development, although approval based on phase 2 data; there was a license fee and subsequent milestone payments                                                                                                                |
| Belviq     | high                 | We were able to track costs since inception.                                                                                                                                                                                                                                           |
| Brineura   | high                 | We were able to track costs since inception.                                                                                                                                                                                                                                           |
| Copiktra   | low                  | There was a deal with Intellikline, Inc.; unclear if licensing or contractual fees captured. They also struck a late deal with Infinity.                                                                                                                                               |
| Crysvita   | medium               | There was an unclear early licensing deal with Kyowa Hakko Kirin. The indirect includes pre-clinical costs, so we are over-estimating the development costs.                                                                                                                           |
| Dificid    | medium               | There was a late commercialization deal, as well as an early collaboration agreement in place with Par Pharmaceutical, Inc. related to the clinical development commercialization of the product. There was also a development and commercialization agreement in place with Astellas. |
| Dupixent   | low                  | There was a complex deal struck between Sanofi and Regeneron which entailed milestone payments, cost sharing, and royalties.                                                                                                                                                           |

| Brand name | R&D estimate quality | Comments                                                                                                                                                                                                                                                                                                                                                                                                     |
|------------|----------------------|--------------------------------------------------------------------------------------------------------------------------------------------------------------------------------------------------------------------------------------------------------------------------------------------------------------------------------------------------------------------------------------------------------------|
| Elzonris   | high                 | We were able to track costs since inception; report small royalties due to Scott and White (medical center).                                                                                                                                                                                                                                                                                                 |
| Eucrisa    | high                 | We were able to track costs since inception.                                                                                                                                                                                                                                                                                                                                                                 |
| Exondys 51 | low                  | It was unclear how R&D costs were reported, so we had to make assumptions about cost breakdown related to Exondys over time. We also had to extrapolate 3 years of data.                                                                                                                                                                                                                                     |
| Eylea      | low                  | There was a complex deal struck between Regeneron and Sanofi/Bayer, which seems to have entailed sizable milestone payments, cost sharing, and royalties.                                                                                                                                                                                                                                                    |
| Fanapt     | low                  | There was a complex deal struck between Vanapt and Novartis, which seems to have entailed milestone payments, cost sharing, and royalties. Novartis regained commercialization rights in amended agreement. In the 2009 10-K, Vanapt Pharmaceuticals stated the following: "Prior to FDA approval, all Fanapt manufacturing-related and milestone costs were included in research and development expenses." |
| Firdapse   | low                  | The active ingredient was discovered in the 1970s, with research and development ongoing for a long time. There was a deal struck between BioMarin and Catalyst late in development; we conservatively assumed 100% of Catalyst's development costs were related to Firdapse.                                                                                                                                |
| Folotyn    | high                 | We were able to track costs since inception. They struck a small deal with Memorial Sloan Kettering in 2004 (fees and milestone payments incurred during development were included in R&D expenses).                                                                                                                                                                                                         |
| Galafold   | high                 | We were able to track costs since inception. They acquired rights to develop and commercialize the therapeutic agent from Mt Sinai School of Medicine (small deal). There was a late commercialization deal with GlaxoSmithKline.                                                                                                                                                                            |

| Brand name | R&D estimate quality | Comments                                                                                                                                                                                                                                                                                                                     |
|------------|----------------------|------------------------------------------------------------------------------------------------------------------------------------------------------------------------------------------------------------------------------------------------------------------------------------------------------------------------------|
| Gattex     | high                 | We were able to track costs since inception. They received some funding from the Canadian government. Licensed from academic collaborator.                                                                                                                                                                                   |
| Hetlioz    | low                  | They acquired the product from Bristol-Myers Squibb in late stages of development. They only started testing for the FDA-approved indication in 2010 (after years of phase 2 and 3 trials in other indications).                                                                                                             |
| Iclusig    | high                 | We were able to track costs since inception; the product was discovered internally.                                                                                                                                                                                                                                          |
| Idhifa     | low                  | There was a complex early licensing deal struck with Celgene, which seems to have entailed milestone payments, cost sharing, and royalties. We did not count the so-called reduction in R&D expenses in our estimates.                                                                                                       |
| Imbruvica  | medium               | They entered into a collaboration and license agreement with Janssen in 2011, after a few years of phase 1 and 2 development. There was an associated reduction in R&D costs (2nd half of 2012 only), but we can still track all of the costs incurred by Pharmacyclics. It is unclear how milestone payments were reported. |
| Ingrezza   | high                 | We were able to track costs since inception. There was a late commercialization deal.                                                                                                                                                                                                                                        |
| Juxtapid   | medium               | They entered into a late licensing arrangement with the University of Pennsylvania (who had previously been donated the license by Bristol-Myers Squibb). There were small upfront fees and milestone payments, but also royalty payments (10%) on future sales.                                                             |
| Kalbitor   | medium               | There was a collaboration agreement with Genzyme Corporation; we did not deduct R&D expenses reimbursed by former joint venture                                                                                                                                                                                              |
| Kengreal   | low                  | There was a complex late deal struck with AstraZeneca, which seems to have entailed milestone payments, cost sharing, and royalties.                                                                                                                                                                                         |

| Brand name | R&D estimate quality | Comments                                                                                                                                                                                                                                                                                                                                |
|------------|----------------------|-----------------------------------------------------------------------------------------------------------------------------------------------------------------------------------------------------------------------------------------------------------------------------------------------------------------------------------------|
| Kerydin    | medium               | The product was discovered internally, but they later struck an “exclusive license, development and commercialization agreement” with Schering-Plough Corporation.                                                                                                                                                                      |
| Kevzara    | low                  | There was a complex deal struck between Sanofi and Regeneron which entailed milestone payments, cost sharing, and royalties.                                                                                                                                                                                                            |
| Kybella    | low                  | There was a complex late deal struck with Bayer, which seems to have entailed milestone payments, cost sharing, and royalties.                                                                                                                                                                                                          |
| Kyprolis   | low                  | They acquired the company Proteolix in 2009, including its development pipeline. It is unclear whether costs associated with acquisition of Proteolix in November 2009 are reflected in R&D expenses.                                                                                                                                   |
| Libtayo    | low                  | There was a complex deal struck between Sanofi and Regeneron which entailed milestone payments, cost sharing, and royalties.                                                                                                                                                                                                            |
| Linzess    | medium               | They entered into co-development and marketing deals with Almirall, Astellas, and Forest Laboratories.                                                                                                                                                                                                                                  |
| Mepsevii   | high                 | We were able to track costs since inception; they licensed the product from St. Louis University for a small up-front fee and subsequent milestone payments which were recorded as R&D expenses.                                                                                                                                        |
| Mytesi     | low                  | The product was licensed in from Napo Pharmaceuticals at phase 3 of development; the deal included upfront payment and milestone fees (both during development and upon sales thresholds being met). It was unclear if milestone payments were recorded as indirect costs, in which case we would likely be under-estimating the costs. |
| Northera   | low                  | There was a complex late licensing deal struck with Dainippon Sumitomo Pharma Co., Ltd.                                                                                                                                                                                                                                                 |
| Nuplazid   | high                 | We were able to track costs since inception.                                                                                                                                                                                                                                                                                            |



| Brand name | R&D estimate quality | Comments                                                                                                                                                                                                                                                                                                                                                                                                                    |
|------------|----------------------|-----------------------------------------------------------------------------------------------------------------------------------------------------------------------------------------------------------------------------------------------------------------------------------------------------------------------------------------------------------------------------------------------------------------------------|
| Nuzyra     | medium               | The therapeutic agent was developed in-house, but missing early data (start with 2013 phase 3 costs). We used the accumulated deficit of 197.9 million as of Dec 2014 as proxy for early development (treated as phase 1), since the company seemed focused almost entirely on Nuzyra.                                                                                                                                      |
| Ocaliva    | high                 | We were able to track costs since inception. There was a late commercialization deal with Sumitomo Dainippon for the Japanese and Chinese markets.                                                                                                                                                                                                                                                                          |
| Orbactiv   | medium               | They acquired the rights to this product through their acquisition of Targanta Therapeutics Corporation in 2009 during late stages of development.                                                                                                                                                                                                                                                                          |
| Palyngiq   | medium               | There were sizable discrepancies in R&D outlays (both total and unallocated) between years; we used amounts reported in most recent available years. In 2005, they entered into a development and commercialization agreement with Merck Serono.                                                                                                                                                                            |
| Praluent   | low                  | There was a complex late deal struck with AstraZeneca, which seems to have entailed milestone payments, cost sharing, and royalties.                                                                                                                                                                                                                                                                                        |
| Rapivab    | medium               | The company received support through a sizable contract with the Biomedical Advanced Research and Development Authority (part of the US Department of Health and Human Services). The contract expired in 2014. They also partnered with Shionogi & Co., Ltd., and another partner for the commercialization of the product in Japan and Israel 2014. The data we collected includes at least 2 years of pre-clinical data. |
| Rhopressa  | high                 | We were able to track costs since inception.                                                                                                                                                                                                                                                                                                                                                                                |
| Rubraca    | medium               | There was a complex deal struck with Pfizer which entailed milestone payments, cost sharing, and royalties.                                                                                                                                                                                                                                                                                                                 |
| Strensiq   | medium               | They acquired the rights to this product through their acquisition of Enobia Pharma Corporation in 2012 during late stages of development.                                                                                                                                                                                                                                                                                  |

| Brand name | R&D estimate quality | Comments                                                                                                                                                                                                                                                     |
|------------|----------------------|--------------------------------------------------------------------------------------------------------------------------------------------------------------------------------------------------------------------------------------------------------------|
| Talzenna   | low                  | There was a late deal struck between BioMarin and Medivation in 2015.                                                                                                                                                                                        |
| Tegsedi    | medium               | The product was developed through a collaboration agreement with GSK.<br>There were both early and late commercialization deals.                                                                                                                             |
| Tibsovo    | low                  | There was an early licensing deal with Celgene which was subsequently terminated.                                                                                                                                                                            |
| Trulance   | high                 | We were able to track costs since inception. We assumed 100% of R&D costs attributable to Trulance in some years, since this seemed to be corroborated by the SEC filings. They entered into a late commercializing agreement with Ironwood Pharmaceuticals. |
| Tymlos     | high                 | We were able to track costs since inception. Small early licensing deal with another entity (Ipsen).                                                                                                                                                         |
| Ultomiris  | high                 | We were able to track costs since inception.                                                                                                                                                                                                                 |
| Varubi     | medium               | At a late stage, they in-licensed the exclusive worldwide rights to the therapeutic agent from OPKO Health, Inc., who in turn had acquired these rights from Schering-Plough Corporation.                                                                    |
| Veltassa   | high                 | We were able to track costs since inception. They entered into a late commercialization deal (outside the US) with Vifor Fresenius Medical Care Renal Pharma Ltd.                                                                                            |
| Viberzi    | medium               | We had to extrapolate the last 2 years due to missing SEC filings.<br>They licensed in the product from Janssen in 2009.                                                                                                                                     |
| Viibryd    | high                 | There was a collaboration agreement with Merck, with all milestone payments recorded as R&D expenses.                                                                                                                                                        |
| Vimizim    | high                 | We were able to track costs since inception.                                                                                                                                                                                                                 |
| Vitrakvi   | high                 | We were able to track costs since inception. There was an early deal with Array, and a late commercialization deal with Bayer in 2018 (year of approval).                                                                                                    |

| Brand name | R&D estimate quality | Comments                                                                                                                                                                                                                                                                                                                       |
|------------|----------------------|--------------------------------------------------------------------------------------------------------------------------------------------------------------------------------------------------------------------------------------------------------------------------------------------------------------------------------|
| Xerava     | high                 | We were able to track costs since inception, including costs borne by the US government (Biomedical Advanced R&D Authority and the National Institute of Allergy and Infectious Disease at the NIH).                                                                                                                           |
| Xtandi     | medium               | There were both early and late deals: They licensed the agent from the University of California at Los Angeles in 2005 (milestone payments, fees, and royalties) and an agreement with Astellas came into effect in 2009 (50/50 sharing of costs related to the development/commercialization of the agent for the US market). |
| Zaltrap    | low                  | There was a complex deal struck between Sanofi and Regeneron which entailed milestone payments, cost sharing, and royalties.                                                                                                                                                                                                   |
| Zejula     | low                  | The product was licensed in from Merck Sharp & Dohme Corp., a subsidiary of Merck. The deal entailed an up-front fee and subsequent milestone and royalty payments.                                                                                                                                                            |
| Zerbaxa    | low                  | There was a merger agreement with the company Calixa, through which the manufacturer acquired the rights to two development candidates. It is unclear whether costs associated with acquisition of Calixa are reflected in R&D expenses.                                                                                       |

**Acronyms:** R&D, research and development.

**eTable 3.** Median Research and Development Outlays (2018 US \$, Millions) by Product Category, Without Adjustment for Costs of Failures<sup>a</sup>

| Characteristics                                                  | R&D costs for full sample<br>(n=63), \$ millions [IQR] |
|------------------------------------------------------------------|--------------------------------------------------------|
| All agents                                                       | 319.3<br>[160.0 – 418.1]                               |
| <b>Agent type</b>                                                |                                                        |
| Pharmacologic                                                    | 309.0<br>[147.2 – 388.0]                               |
| Biologic                                                         | 391.3<br>[188.1 – 792.5]                               |
| P value                                                          | .03                                                    |
| <b>Therapeutic area<sup>b</sup></b>                              |                                                        |
| Alimentary tract<br>and metabolism                               | 343.7<br>[160.0 – 395.6]                               |
| Anti-infective agents for<br>systemic use                        | 388.0<br>[301.2 – 461.8]                               |
| Antineoplastic and<br>immuno-modulating<br>agents                | 358.55<br>[180.7 – 425.1]                              |
| Nervous system                                                   | 187.65<br>[130.5 – 326.3]                              |
| Other                                                            | 236.4<br>[147.2 – 418.1]                               |
| P value                                                          | .51                                                    |
| <b>Orphan status</b>                                             |                                                        |
| Yes                                                              | 272.1<br>[147.2 – 384.1]                               |
| No                                                               | 326.3<br>[195.3 – 551.9]                               |
| P value                                                          | .15                                                    |
| <b>Accelerated approval</b>                                      |                                                        |
| Yes                                                              | 351.2<br>[147.2 – 384.1]                               |
| No                                                               | 309.0<br>[166.5 – 430.5]                               |
| P value                                                          | .94                                                    |
| <b>Any expedited development or approval pathway<sup>c</sup></b> |                                                        |
| Yes                                                              | 322.1<br>[158.0 – 418.9]                               |
| No                                                               | 312.0<br>[197.1 – 390.0]                               |

| Characteristics                            | R&D costs for full sample<br>(n=63), \$ millions [IQR] |
|--------------------------------------------|--------------------------------------------------------|
| P value                                    | .99                                                    |
| <b>Innovativeness</b>                      |                                                        |
| First in class                             | 262.6<br>[146.2 – 418.1]                               |
| Next in class                              | 326.3<br>[195.3 – 409.8]                               |
| P value                                    | .43                                                    |
| <b>Route of administration<sup>d</sup></b> |                                                        |
| Injection                                  | 319.1<br>[198.3 – 602.2]                               |
| Intravenous                                | 347.7<br>[155.9 – 418.1]                               |
| Oral                                       | 322.1<br>[143.5 – 392.8]                               |
| Other                                      | 197.1<br>[136.4 – 208.0]                               |
| P value                                    | .38                                                    |
| <b>Year of approval</b>                    |                                                        |
| 2009 to 2013                               | 272.1<br>[139.8 – 383.4]                               |
| 2014 to 2018                               | 326.3<br>[167.9 – 430.5]                               |
| P value                                    | .27                                                    |

**Acronyms:** \$, United States dollars; FDA, Food and Drug Administration; IQR, interquartile range; R&D, research and development.

<sup>a</sup> Total non-capitalized direct and indirect expenses incurred across all phases of development.

<sup>b</sup> Other therapeutic areas included blood and blood forming organs, cardiovascular system, dermatologicals, musculo-skeletal system, sensory organs, and various.

<sup>c</sup> Included accelerated approval, breakthrough therapy, fast track, orphan drug, and priority review.

<sup>d</sup> Injection included intramuscular and subcutaneous; other routes included multiple, ophthalmic, and topical.

**eTable 4.** Research and Development Costs (2018 US \$, Millions), Broken Down by Phase of Clinical Development, for All Therapeutic Agents Included in the Analysis<sup>a</sup>

| Brand name | Quality of estimate | Actual R&D outlay, without success rate adjustment or cost of capital (\$, in millions) |         |         |        | Pre-clinical costs, with success rate adjustments and cost of capital (\$, in millions) <sup>b</sup> |                         |
|------------|---------------------|-----------------------------------------------------------------------------------------|---------|---------|--------|------------------------------------------------------------------------------------------------------|-------------------------|
|            |                     | Phase 1                                                                                 | Phase 2 | Phase 3 | Total  | Pre-clinical (adjusted)                                                                              | Share of total estimate |
| Adcetris   | medium              | 89.3                                                                                    | 95.5    | 178.2   | 363    | 444.7                                                                                                | 27.3%                   |
| Alunbrig   | high                | 9.9                                                                                     | 243     | 98.1    | 351    | 95.2                                                                                                 | 8.1%                    |
| Aristada   | high                |                                                                                         | 47.2    | 281.9   | 329.1  | 38.7                                                                                                 | 5.1%                    |
| Beleodaq   | low                 |                                                                                         | 89.4    |         | 89.4   | L                                                                                                    |                         |
| Belviq     | high                | 74.5                                                                                    | 136     | 606.5   | 817    | 916.5                                                                                                | 26.8%                   |
| Brineura   | high                | 42.4                                                                                    | 220.1   |         | 262.5  | 515.4                                                                                                | 45.0%                   |
| Copiktra   | low                 | 146.2                                                                                   | 45.4    | 460.3   | 651.9  | L                                                                                                    |                         |
| Crysvita   | medium              | 4                                                                                       | 21.9    | 140.6   | 166.5  | L                                                                                                    |                         |
| Dificid    | medium              | 4.2                                                                                     | 6.9     | 128.7   | 139.8  | 26.3                                                                                                 | 7.0%                    |
| Dupixent   | low                 | 140.2                                                                                   | 363.9   | 1615.8  | 2119.9 | U                                                                                                    |                         |
| Elzonris   | high                |                                                                                         | 167.9   |         | 167.9  | U                                                                                                    |                         |
| Eucrisa    | high                | 29.7                                                                                    | 49      | 129.3   | 208    | U                                                                                                    |                         |
| Exondys 51 | low                 | 17.2                                                                                    | 166.2   | 234.7   | 418.1  | 103.1                                                                                                | 7.9%                    |
| Eylea      | low                 | 112.9                                                                                   | 89.3    | 790.6   | 992.8  | L                                                                                                    |                         |
| Fanapt     | low                 |                                                                                         | 10.9    | 92.5    | 103.4  | L                                                                                                    |                         |
| Firdapse   | low                 |                                                                                         |         | 108     | 108    | L                                                                                                    |                         |
| Folotyn    | high                | 19.1                                                                                    | 89      |         | 108.1  | L                                                                                                    |                         |
| Galafold   | high                | 27.5                                                                                    | 43.7    | 324.4   | 395.6  | L                                                                                                    |                         |
| Gattex     | high                | 1.5                                                                                     | 54.6    | 252.9   | 309    | L                                                                                                    |                         |

| Brand name | Quality of estimate | Actual R&D outlay,<br>without success rate adjustment<br>or cost of capital<br>(\$, in millions) |         |         |       | Pre-clinical costs,<br>with success rate adjustments<br>and cost of capital<br>(\$, in millions) <sup>b</sup> |                            |
|------------|---------------------|--------------------------------------------------------------------------------------------------|---------|---------|-------|---------------------------------------------------------------------------------------------------------------|----------------------------|
|            |                     | Phase 1                                                                                          | Phase 2 | Phase 3 | Total | Pre-clinical<br>(adjusted)                                                                                    | Share of<br>total estimate |
| Hetlioz    | low                 |                                                                                                  | 77      | 110.1   | 187.1 | L                                                                                                             |                            |
| Iclusig    | high                | 49.5                                                                                             | 222.6   |         | 272.1 | U                                                                                                             |                            |
| Idhifa     | low                 | 22.6                                                                                             | 47.1    | 15.5    | 85.2  | 238.4                                                                                                         | 50.7%                      |
| Imbruvica  | medium              | 91.9                                                                                             | 69.6    | 159.3   | 320.8 | 171.2                                                                                                         | 12.4%                      |
| Ingrezza   | high                | 13.8                                                                                             | 108.1   | 201.5   | 323.4 | 133.5                                                                                                         | 12.6%                      |
| Juxtapid   | medium              |                                                                                                  | 18.2    | 88.5    | 106.7 | L                                                                                                             |                            |
| Kalbitor   | medium              | 6.4                                                                                              | 60      | 142     | 208.4 | U                                                                                                             |                            |
| Kengreal   | low                 |                                                                                                  |         | 312     | 312   | L                                                                                                             |                            |
| Kerydin    | medium              | 30                                                                                               | 8.2     | 77.1    | 115.3 | U                                                                                                             |                            |
| Kevzara    | low                 | 80.7                                                                                             |         | 630.7   | 711.4 | 371.7                                                                                                         | 12.8%                      |
| Kybella    | low                 |                                                                                                  | 53.1    | 183.4   | 236.5 | 100.2                                                                                                         | 14.7%                      |
| Kyprolis   | low                 |                                                                                                  | 50.4    | 333.1   | 383.5 | L                                                                                                             |                            |
| Libtayo    | low                 | 67.3                                                                                             | 674.4   |         | 741.7 | L                                                                                                             |                            |
| Linzess    | medium              | 90.9                                                                                             | 84.1    | 215.2   | 390.2 | U                                                                                                             |                            |
| Mepsevii   | high                | 12.7                                                                                             | 12.6    | 121.1   | 146.4 | L                                                                                                             |                            |
| Mytesi     | low                 |                                                                                                  |         | 73.8    | 73.8  | L                                                                                                             |                            |
| Northera   | low                 |                                                                                                  |         | 147.2   | 147.2 | L                                                                                                             |                            |
| Nuplazid   | high                | 34.9                                                                                             | 106.8   | 373.2   | 514.9 | 642.3                                                                                                         | 23.0%                      |
| Nuzyra     | medium              | 205.9                                                                                            |         | 255.9   | 461.8 | L                                                                                                             |                            |
| Ocaliva    | high                | 28.4                                                                                             | 23.9    | 299     | 351.3 | U                                                                                                             |                            |
| Orbactiv   | medium              |                                                                                                  |         | 155.9   | 155.9 | L                                                                                                             |                            |

| Brand name | Quality of estimate | Actual R&D outlay,<br>without success rate adjustment<br>or cost of capital<br>(\$, in millions) |         |         |       | Pre-clinical costs,<br>with success rate adjustments<br>and cost of capital<br>(\$, in millions) <sup>b</sup> |                            |
|------------|---------------------|--------------------------------------------------------------------------------------------------|---------|---------|-------|---------------------------------------------------------------------------------------------------------------|----------------------------|
|            |                     | Phase 1                                                                                          | Phase 2 | Phase 3 | Total | Pre-clinical<br>(adjusted)                                                                                    | Share of<br>total estimate |
| Palynziq   | medium              | 97                                                                                               | 145.5   | 600.7   | 843.2 | 13.1                                                                                                          | 0.3%                       |
| Praluent   | low                 | 92                                                                                               | 107.7   | 1045.3  | 1245  | L                                                                                                             |                            |
| Rapivab    | medium              | 24.2                                                                                             | 151.3   | 125.8   | 301.3 | 49.4                                                                                                          | 3.3%                       |
| Rhopressa  | high                | 13.6                                                                                             | 24.8    | 98      | 136.4 | U                                                                                                             |                            |
| Rubraca    | medium              |                                                                                                  | 77.2    | 307     | 384.2 | L                                                                                                             |                            |
| Strensiq   | medium              |                                                                                                  | 160     |         | 160   | L                                                                                                             |                            |
| Talzenna   | low                 |                                                                                                  | 71.8    | 516.9   | 588.7 | 91.9                                                                                                          | 6.4%                       |
| Tegsedi    | medium              | 11.3                                                                                             |         | 177     | 188.3 | U                                                                                                             |                            |
| Tibsovo    | low                 | 256.1                                                                                            | 174.4   |         | 430.5 | 447.1                                                                                                         | 18.0%                      |
| Trulance   | high                | 7.3                                                                                              | 87.5    | 253.3   | 348.1 | 9.3                                                                                                           | 0.9%                       |
| Tymlos     | high                | 28.3                                                                                             | 21.4    | 255.7   | 305.4 | L                                                                                                             |                            |
| Ultomiris  | high                | 9.1                                                                                              | 70.6    | 274.6   | 354.3 | U                                                                                                             |                            |
| Varubi     | medium              |                                                                                                  | 23.6    | 173.6   | 197.2 | L                                                                                                             |                            |
| Veltassa   | high                | 60.7                                                                                             | 67.5    | 191.2   | 319.4 | U                                                                                                             |                            |
| Viberzi    | medium              | 17.3                                                                                             | 71.6    | 254.8   | 343.7 | L                                                                                                             |                            |
| Viibryd    | high                |                                                                                                  | 7       | 146     | 153   | L                                                                                                             |                            |
| Vimizim    | high                | 33.2                                                                                             | 114.3   | 345.5   | 493   | 109.7                                                                                                         | 6.8%                       |
| Vitrakvi   | high                | 15                                                                                               | 104.2   |         | 119.2 | U                                                                                                             |                            |
| Xerava     | high                | 31                                                                                               | 31.6    | 325.3   | 387.9 | U                                                                                                             |                            |
| Xtandi     | medium              | 8.8                                                                                              | 41.3    | 143.6   | 193.7 | L                                                                                                             |                            |
| Zaltrap    | low                 | 117.4                                                                                            | 138.2   | 164.1   | 419.7 | L                                                                                                             |                            |



| Brand name        | Quality of estimate | Actual R&D outlay,<br>without success rate adjustment<br>or cost of capital<br>(\$, in millions) |         |         |       | Pre-clinical costs,<br>with success rate adjustments<br>and cost of capital<br>(\$, in millions) <sup>b</sup> |                            |
|-------------------|---------------------|--------------------------------------------------------------------------------------------------|---------|---------|-------|---------------------------------------------------------------------------------------------------------------|----------------------------|
|                   |                     | Phase 1                                                                                          | Phase 2 | Phase 3 | Total | Pre-clinical<br>(adjusted)                                                                                    | Share of<br>total estimate |
| Zejula            | low                 |                                                                                                  | 19.3    | 380.8   | 400.1 | L                                                                                                             |                            |
| Zerbaxa           | low                 |                                                                                                  | 279.3   | 628.4   | 907.7 | L                                                                                                             |                            |
| Mean <sup>c</sup> |                     | 52.9                                                                                             | 100.8   | 291.6   | 374.1 | 237.8                                                                                                         |                            |

**Acronyms:** \$, dollars; L, licensed / acquired through purchase; R&D, research and development; U, unclear.

<sup>a</sup> Phase 1 or 2 costs were not recorded if a company initiated a phase 1/2 or 2/3 trial, since those were categorized as phases 2 and 3, respectively. The costs incurred during the filing of a new drug application (NDA) or biologics license application (BLA) were included in the final phase for each drug. Under the "actual R&D outlay" section of this table, pre-clinical outlays, where captured, were recorded as part of the first phase of clinical development for a particular agent.

<sup>b</sup> These reflected pre-clinical costs with success rate adjustments and costs of capital (10.5%), with shares calculated as % of the final estimate presented in eTable 6 (under Wong et al. (10.5%)).

<sup>c</sup> Costs in certain phases were not recorded for some drugs since expenditures could not always be disaggregated between phases (i.e., due to licensing and phase 1/2 and 2/3 trials being treated as phases 2 and 3, respectively). For example, if a company recorded \$50 million in costs for a phase 1 trial and \$250 million in costs for a phase 2/3 trial, then it was not possible to provide the breakdown of costs for phase 2 vs 3. This was not necessary to produce the estimates in the present paper, since the whole phase 2/3 trial was treated as phase 3 trial for the purposes of clinical trial success rate adjustments, as done in previous studies of clinical trial success rates (e.g., Wong et al., Hay et al., and Thomas et al. studies presented in the paper). Wong et al., in the Methods section of their paper, explained: "We make the standard assumption that Phase 1/2 and Phase 2/3 trials are to be considered as Phase 2 and 3, respectively." The same issue arose when a drug was licensed after clinical testing had already begun, where milestone payments / license fees were taken to indirectly capture earlier costs. The phase-specific mean values presented here are based on the observed costs in eTable 5 (with "missing" observations dropped). Consequently, the mean cost across all phases (i.e., mean for the Total column) does not equal the sum of the means for each individual phase.

**eTable 5.** Dates of Clinical Trial Phase Changes for All Therapeutic Agents Included in the Analysis<sup>a</sup>

| Brand name | Start year        | IND submission        | Phase 2 start (d/m/y) | Phase 3 start (d/m/y)       | NDA/BLA submission (d/m/y) | Date of FDA approval (d/m/y) | Duration (years) <sup>h</sup> |
|------------|-------------------|-----------------------|-----------------------|-----------------------------|----------------------------|------------------------------|-------------------------------|
| Adcetris   | 2002              | 27/06/06              | 01/02/09              | 01/04/10                    | 25/02/11                   | 19/08/11                     | 9.6                           |
| Alunbrig   | 2010              | 28/06/11              | 20/09/11              | 26/05/16                    | 29/08/16                   | 28/04/17                     | 7.3                           |
| Aristada   | 2010              | 16/07/10              | 01/01/10              | 01/12/11                    | 22/08/14                   | 05/10/15                     | 5.8                           |
| Beleodaq   | 2010              | 2004                  | 01/02/10              | [Approval based on phase 2] | 08/12/13                   | 03/07/14                     | 4.5                           |
| Belviq     | 2003              | 25/05/04              | 01/12/04              | 01/09/06                    | 18/12/09                   | 27/06/12                     | 9.5                           |
| Brineura   | 2009              | 01/03/14 <sup>e</sup> | 01/09/13              | [Approval based on phase 2] | 27/05/16                   | 27/04/17                     | 8.3                           |
| Copiktra   | 2012              | 18/08/11              | 01/05/13              | 01/11/13                    | 02/02/18                   | 24/09/18                     | 6.7                           |
| Crysvita   | 2013              | 15/10/13 <sup>c</sup> | 02/07/14              | 01/12/15                    | 17/08/17                   | 17/04/18                     | 5.3                           |
| Dificid    | 2003              | 01/08/03              | 01/07/04              | 01/05/06                    | 29/11/10                   | 27/05/11                     | 8.4                           |
| Dupixent   | 2009              | 30/06/10              | 01/04/12              | 01/09/14                    | 29/07/16                   | 28/03/17                     | 8.2                           |
| Elzonris   | 2009              | 27/06/14              | 01/01/09              | [Approval based on phase 2] | 21/06/18                   | 21/12/18                     | 10.0                          |
| Eucrisa    | 2006 <sup>b</sup> | 20/04/08              | 01/05/11              | 01/03/14                    | 07/01/16                   | 14/12/16                     | 11.0                          |
| Exondys 51 | 2007              | 09/08/07              | 01/01/09              | 17/11/14                    | 26/06/15                   | 19/09/16                     | 9.7                           |
| Eylea      | 2004              | 16/05/05              | 01/04/06              | 01/08/07                    | 17/02/11                   | 18/11/11                     | 7.9                           |
| Fanapt     | 2004              | 2004                  | 01/06/04              | 01/11/05                    | 27/09/07                   | 06/05/09                     | 5.4                           |
| Firdapse   | 2009              | 14/12/10              | [Licensed in phase 3] | 01/06/11                    | 28/03/18                   | 28/11/18                     | 9.9                           |
| Folotyn    | 2002              | 31/01/97              | 01/08/06              | [Approval based on phase 2] | 23/03/09                   | 24/09/09                     | 7.7                           |
| Galafold   | 2002 <sup>b</sup> | 03/02/04 <sup>d</sup> | 02/01/06              | 01/04/09                    | 13/12/17                   | 10/08/18                     | 16.6                          |
| Gattex     | 1998 <sup>b</sup> | 26/04/99 <sup>e</sup> | 01/07/00              | 01/04/04                    | 30/11/11                   | 21/12/12                     | 15.0                          |

| Brand name | Start year        | IND submission          | Phase 2 start (d/m/y)    | Phase 3 start (d/m/y)                    | NDA/BLA submission (d/m/y) | Date of FDA approval (d/m/y) | Duration (years) <sup>h</sup> |
|------------|-------------------|-------------------------|--------------------------|------------------------------------------|----------------------------|------------------------------|-------------------------------|
| Hetlioz    | 2004              | 17/05/04 <sup>c</sup>   | 01/02/04                 | 01/08/10                                 | 31/05/13                   | 31/01/14                     | 10.1                          |
| Iclusig    | 2008              | 21/11/07                | 30/09/10                 | [Approval based on phase 2]              | 30/07/12                   | 14/12/12                     | 5.0                           |
| Idhifa     | 2011              | 01/07/13                | 27/08/13                 | 30/12/15                                 | 30/12/16                   | 01/08/17                     | 6.6                           |
| Imbruvica  | 2005              | 07/10/08                | 01/02/11                 | 10/12/12                                 | 28/06/13                   | 13/11/13                     | 8.9                           |
| Ingrezza   | 2008              | 19/07/11 <sup>e</sup>   | 01/10/10                 | 01/10/14                                 | 11/08/16                   | 11/04/17                     | 9.3                           |
| Juxtapid   | 2005              | 13/04/07 <sup>c,e</sup> | 01/01/05                 | 01/12/07                                 | 28/02/12                   | 21/12/12                     | 8.0                           |
| Kalbitor   | 1998              | 30/04/02 <sup>e</sup>   | 01/07/00                 | 01/12/05                                 | 23/09/08                   | 01/12/09                     | 11.9                          |
| Kengreal   | 2004              | 10/02/99                | [Licensed in phase 3]    | 01/01/04                                 | 23/12/14                   | 22/06/15                     | 11.5                          |
| Kerydin    | 2004 <sup>b</sup> | 03/10/05 <sup>d</sup>   | 01/11/05                 | 01/12/10                                 | 26/07/13                   | 07/07/14                     | 10.5                          |
| Kevzara    | 2007              | 16/10/07 <sup>d</sup>   | [Phase 2/3 treated as 3] | 01/06/09                                 | 30/10/15                   | 22/05/17                     | 10.4                          |
| Kybella    | 2007              | 01/11/07                | 01/08/07                 | 01/12/10                                 | 13/05/14                   | 29/04/15                     | 8.3                           |
| Kyprolis   | 2009              | 13/06/05                | 01/01/09                 | 14/07/10                                 | 26/09/11                   | 20/07/12                     | 3.6                           |
| Libtayo    | 2015              | 10/09/15                | 11/05/16                 | [Approval based on phase 2]              | 28/02/18                   | 28/09/18                     | 3.7                           |
| Linzess    | 2008              | 14/04/08 <sup>c</sup>   | 01/11/06                 | 01/08/08                                 | 08/08/11                   | 30/08/12                     | 4.7                           |
| Mepsevii   | 2010              | 10/10/14 <sup>e</sup>   | 01/11/13                 | 01/12/14                                 | 16/03/17                   | 15/11/17                     | 7.9                           |
| Mytesi     | 2008              | 01/12/08 <sup>c</sup>   | [Licensed in phase 3]    | [Approval based on phase 2] <sup>f</sup> | 05/12/11                   | 31/12/12                     | 5.0                           |
| Northera   | 2006              | 01/09/07                | [Licensed in phase 3]    | 01/05/06                                 | 23/09/11                   | 18/02/14                     | 8.1                           |
| Nuplazid   | 2002              | 02/07/03 <sup>d</sup>   | 01/03/04                 | 01/06/07                                 | 03/09/15                   | 29/04/16                     | 14.3                          |

| Brand name | Start year        | IND submission        | Phase 2 start (d/m/y)                         | Phase 3 start (d/m/y)       | NDA/BLA submission (d/m/y) | Date of FDA approval (d/m/y) | Duration (years) <sup>h</sup> |
|------------|-------------------|-----------------------|-----------------------------------------------|-----------------------------|----------------------------|------------------------------|-------------------------------|
| Nuzyra     | 2012              | Not found             | [Reported costs phase 3 onwards] <sup>g</sup> | 01/03/09                    | 02/02/18                   | 02/10/18                     | 6.8                           |
| Ocaliva    | 2002              | 27/01/06              | 01/10/07                                      | 01/01/12                    | 27/06/15                   | 27/05/16                     | 14.4                          |
| Orbactiv   | 2009              | 01/08/96              | [Licensed in phase 3]                         | 01/12/10                    | 06/12/13                   | 06/08/14                     | 5.6                           |
| Palyngiq   | 2004              | 27/11/07              | 01/09/09                                      | 01/05/13                    | 30/06/17                   | 24/05/18                     | 14.4                          |
| Praluent   | 2009              | 12/11/09              | 01/01/11                                      | 01/06/12                    | 24/11/14                   | 24/07/15                     | 6.6                           |
| Rapivab    | 2004              | 23/11/05              | 01/01/07                                      | 01/09/09                    | 19/12/13                   | 19/12/14                     | 11.0                          |
| Rhopressa  | 2010              | Not found             | 01/03/12                                      | 01/07/14                    | 28/02/17                   | 18/12/17                     | 8.0                           |
| Rubraca    | 2011              | 11/09/11              | 01/01/11                                      | 01/04/14                    | 23/06/16                   | 19/12/16                     | 6.0                           |
| Strensiq   | 2012              | 04/06/14 <sup>c</sup> | 01/01/12                                      | [Approval based on phase 2] | 23/12/14                   | 23/10/15                     | 3.8                           |
| Talzenna   | 2010              | 10/12/10 <sup>c</sup> | 01/01/10                                      | 01/10/13                    | 06/04/18                   | 16/10/18                     | 8.8                           |
| Tegsedi    | 2012              | 09/11/12              | [Licensed in phase 3]                         | 01/02/13                    | 06/11/17                   | 05/10/18                     | 6.8                           |
| Tibsovo    | 2011              | 20/12/13              | [Moved from phase 1 to 3]                     | 01/04/17                    | 21/12/17                   | 20/07/18                     | 7.6                           |
| Trulance   | 2008              | 02/04/08              | 01/02/10                                      | 13/11/13                    | 29/01/16                   | 19/01/17                     | 9.1                           |
| Tymlos     | 2008              | 08/12/05              | 01/01/08                                      | 01/04/11                    | 30/03/16                   | 28/04/17                     | 9.3                           |
| Ultomiris  | 2013              | Not found             | 01/07/15                                      | 20/12/16                    | 18/06/18                   | 21/12/18                     | 6.0                           |
| Varubi     | 2010              | 01/10/05 <sup>d</sup> | 01/12/10                                      | 01/02/12                    | 05/09/14                   | 01/09/15                     | 5.7                           |
| Veltassa   | 2007 <sup>b</sup> | 01/12/07              | 01/01/11                                      | 01/02/13                    | 21/10/14                   | 21/10/15                     | 8.8                           |
| Viberzi    | 2009              | 21/11/07              | 01/04/10                                      | 01/06/12                    | 26/06/14                   | 27/05/15                     | 6.4                           |
| Viibryd    | 2004              | 21/11/97              | 01/09/04                                      | 01/02/06                    | 22/03/10                   | 21/01/11                     | 7.1                           |

| Brand name | Start year        | IND submission        | Phase 2 start (d/m/y) | Phase 3 start (d/m/y)       | NDA/BLA submission (d/m/y) | Date of FDA approval (d/m/y) | Duration (years) <sup>h</sup> |
|------------|-------------------|-----------------------|-----------------------|-----------------------------|----------------------------|------------------------------|-------------------------------|
| Vimizim    | 2005              | 28/12/07              | 01/11/08              | 01/02/11                    | 29/03/13                   | 14/02/14                     | 8.1                           |
| Vitrakvi   | 2013              | 28/02/14              | 01/10/15              | [Approval based on phase 2] | 24/03/18                   | 26/11/18                     | 5.9                           |
| Xerava     | 2009 <sup>b</sup> | 20/08/09              | 01/01/12              | 01/08/13                    | 28/12/17                   | 27/08/18                     | 10.7                          |
| Xtandi     | 2005              | 01/02/07              | 23/07/07              | 30/09/09                    | 21/05/12                   | 31/08/12                     | 7.7                           |
| Zaltrap    | 2004              | Not found             | 01/09/05              | 01/11/07                    | 03/02/12                   | 03/08/12                     | 8.6                           |
| Zejula     | 2012              | 01/09/12 <sup>c</sup> | 01/01/12              | 01/06/13                    | 01/11/16                   | 27/03/17                     | 5.2                           |
| Zerbaxa    | 2009              | 01/07/09              | 01/12/09              | 01/07/11                    | 21/04/14                   | 19/12/14                     | 6.0                           |

**Acronyms:** BLA, biologics license application; FDA, Food and Drug Administration; IND, investigational new drug [application]; NDA, new drug application.

<sup>a</sup> These dates corresponded to the coding of the phase data in our analyses. Although these data generally were aligned with the actual start dates of phases 2 and 3 of clinical development, there were discrepancies in some cases. For example, if company X acquired the rights to a product in 2013 from company Y after the latter firm had already been conducting a phase 3 trial for two years, we would report 2013 as the start of phase 3 testing to match our collected data. All data prior to the start of phase 2 were treated as phase 1. For the date of the investigational new drug application, we relied on the date the application was filed (obtained from Drugs@FDA database). If this date was unavailable, we reported the date that the investigational new drug application was approved or opened by the FDA. In some cases, the investigational new drug application dates shown in the table relate to the application filed by the originator company, not the company that subsequently licensed the product and brought it to market. We checked dates for consistency with the Securities and Exchange Commission filings. If unclear, it was assumed that no pre-clinical costs were reflected in our estimates, regardless of dates listed in this table.

<sup>b</sup> The start year was deduced from since inception statement in Securities and Exchange Commission filings.

<sup>c</sup> The transfer date for the investigational new drug application.

<sup>d</sup> Date of pre-investigational new drug application meeting, which was used as a proxy for the date of submission of the investigational new drug application (unavailable).

<sup>e</sup> Clinical testing was conducted outside the US prior to submission of investigational new drug application.

<sup>f</sup> All costs were treated as Phase 2.

<sup>g</sup> We treated the amount reported “since inception” as phase 1, which is why no phase 2 date was recorded.

<sup>h</sup> This corresponds to the total numbers of years for which we were able to collect R&D expenditures. This duration may have been lower than the actual number of years of clinical development when there were licensing arrangements, acquisition and mergers, or other collaborations between parties.

**eTable 6.** Estimated Research and Development Costs (2018 US \$, Millions) for All Therapeutic Agents Included in the Analysis<sup>a</sup>

| Brand name | Actual R&D outlay | Wong et al. (0.0%) | Wong et al. (7.0%) | Wong et al. (10.5%) | Wong et al. (10.5% + pre-clinical excl. licensed) <sup>b</sup> | Wong et al. (10.5% + pre-clinical incl. licensed) <sup>c</sup> | Hay et al. (10.5%) | Thomas et al. (10.5%) | Therapeutic-area -specific rates (10.5%) |
|------------|-------------------|--------------------|--------------------|---------------------|----------------------------------------------------------------|----------------------------------------------------------------|--------------------|-----------------------|------------------------------------------|
| Adcetris   | 363.0             | 1,185.3            | 1,461.2            | 1,627.9             | 2,072.2                                                        | 2,072.2                                                        | 2,373.4            | 2,527.3               | 6,255.2                                  |
| Alunbrig   | 351.0             | 895.9              | 1,076.6            | 1,180.6             | 1,900.9                                                        | 1,900.9                                                        | 2,289.1            | 2,417.6               | 5,463.2                                  |
| Aristada   | 329.2             | 579.3              | 692.0              | 755.5               | 1,255.3                                                        | 1,255.3                                                        | 1,081.1            | 1,109.9               | 994.3                                    |
| Beleodaq   | 89.4              | 229.5              | 283.5              | 314.3               | 314.3                                                          | 550.4                                                          | 659.4              | 696.7                 | 1,568.6                                  |
| Belviq     | 817.1             | 1,893.3            | 2,811.5            | 3,422.1             | 4,388.1                                                        | 4,388.1                                                        | 5,929.3            | 5,171.7               | 3,572.8                                  |
| Brineura   | 262.6             | 806.8              | 1,018.1            | 1,146.2             | 1,104.7                                                        | 1,104.7                                                        | 1,912.1            | 2,033.7               | 1,220.1                                  |
| Copiktra   | 651.9             | 1,954.7            | 2,692.9            | 3,147.2             | 3,147.2                                                        | 5,511.7                                                        | 4,195.3            | 4,440.3               | 10,501.4                                 |
| Crysvita   | 166.5             | 307.3              | 352.1              | 376.5               | 376.5                                                          | 659.4                                                          | 524.5              | 540.7                 | 374.1                                    |
| Dificid    | 139.8             | 261.5              | 333.7              | 377.8               | 661.6                                                          | 661.6                                                          | 487.7              | 501.5                 | 412.9                                    |
| Dupixent   | 2,119.8           | 4,568.8            | 5,718.5            | 6,419.0             | 11,241.7                                                       | 11,241.7                                                       | 9,240.1            | 9,659.7               | 6,019.3                                  |
| Elzonris   | 167.9             | 442.8              | 519.2              | 564.0               | 987.7                                                          | 987.7                                                          | 1,191.8            | 1,259.7               | 2,845.3                                  |
| Eucrisa    | 208.0             | 551.9              | 731.5              | 846.2               | 1,482.0                                                        | 1,482.0                                                        | 1,249.3            | 1,322.3               | 748.6                                    |
| Exondys 51 | 418.1             | 915.4              | 1,149.3            | 1,297.8             | 2,092.3                                                        | 2,092.3                                                        | 2,193.0            | 2,306.4               | 1,385.2                                  |
| Eylea      | 992.8             | 2,316.2            | 2,981.0            | 3,393.0             | 3,393.0                                                        | 5,942.2                                                        | 4,577.5            | 4,804.1               | 2,270.4                                  |
| Fanapt     | 103.3             | 175.6              | 211.4              | 231.3               | 231.3                                                          | 405.1                                                          | 313.2              | 319.8                 | 292.6                                    |
| Firdapse   | 108.0             | 177.6              | 240.6              | 281.4               | 281.4                                                          | 492.8                                                          | 329.7              | 331.9                 | 323.0                                    |
| Folotyn    | 108.0             | 356.0              | 431.8              | 477.3               | 477.3                                                          | 835.9                                                          | 809.7              | 862.7                 | 2,118.3                                  |
| Galafold   | 395.6             | 855.7              | 1,498.6            | 2,015.2             | 2,015.2                                                        | 3,529.2                                                        | 2,836.2            | 2,974.2               | 2,070.9                                  |
| Gattex     | 309.0             | 567.9              | 848.9              | 1,048.1             | 1,048.1                                                        | 1,835.6                                                        | 1,620.3            | 1,678.4               | 1,298.5                                  |
| Hetlioz    | 187.0             | 396.9              | 561.8              | 671.2               | 671.2                                                          | 1,175.5                                                        | 1,232.3            | 1,291.1               | 1,062.4                                  |
| Iclusig    | 272.1             | 899.2              | 988.2              | 1,036.2             | 1,814.7                                                        | 1,814.7                                                        | 1,773.4            | 1,887.1               | 4,588.8                                  |
| Idhifa     | 85.2              | 322.4              | 415.6              | 470.6               | 406.7                                                          | 406.7                                                          | 767.5              | 819.7                 | 2,051.8                                  |

| Brand name | Actual R&D outlay | Wong et al. (0.0%) | Wong et al. (7.0%) | Wong et al. (10.5%) | Wong et al. (10.5% + pre-clinical excl. licensed) <sup>b</sup> | Wong et al. (10.5% + pre-clinical incl. licensed) <sup>c</sup> | Hay et al. (10.5%) | Thomas et al. (10.5%) | Therapeutic-area -specific rates (10.5%) |
|------------|-------------------|--------------------|--------------------|---------------------|----------------------------------------------------------------|----------------------------------------------------------------|--------------------|-----------------------|------------------------------------------|
| Imbruvica  | 320.9             | 1,095.0            | 1,279.0            | 1,383.9             | 2,123.8                                                        | 2,123.8                                                        | 1,975.5            | 2,105.8               | 5,269.2                                  |
| Ingrezza   | 323.3             | 717.6              | 930.0              | 1,063.3             | 1,628.4                                                        | 1,628.4                                                        | 1,747.8            | 1,834.7               | 1,473.5                                  |
| Juxtapid   | 106.6             | 190.7              | 231.5              | 255.6               | 255.6                                                          | 447.6                                                          | 383.0              | 394.9                 | 255.5                                    |
| Kalbitor   | 208.3             | 438.8              | 586.2              | 683.2               | 1,196.5                                                        | 1,196.5                                                        | 1,104.8            | 1,157.0               | 709.7                                    |
| Kengreal   | 312.0             | 526.6              | 776.9              | 943.8               | 943.8                                                          | 1,652.9                                                        | 1,112.7            | 1,121.5               | 876.2                                    |
| Kerydin    | 115.2             | 364.0              | 522.5              | 625.8               | 1,096.0                                                        | 1,096.0                                                        | 836.1              | 890.0                 | 479.0                                    |
| Kevzara    | 711.4             | 1,587.7            | 2,369.8            | 2,910.6             | 4,446.4                                                        | 4,446.4                                                        | 3,614.0            | 3,781.3               | 2,697.8                                  |
| Kybella    | 236.4             | 450.8              | 593.4              | 683.6               | 1,021.7                                                        | 1,021.7                                                        | 1,102.2            | 1,143.7               | 746.2                                    |
| Kyprolis   | 383.4             | 621.2              | 671.1              | 697.0               | 697.0                                                          | 1,220.7                                                        | 959.7              | 980.0                 | 1,657.9                                  |
| Libtayo    | 741.7             | 1,964.9            | 2,137.7            | 2,228.3             | 2,228.3                                                        | 3,902.5                                                        | 3,926.1            | 4,150.3               | 9,569.7                                  |
| Linzess    | 390.0             | 1,235.9            | 1,780.4            | 2,134.6             | 3,738.4                                                        | 3,738.4                                                        | 3,086.8            | 3,285.1               | 1,971.8                                  |
| Mepsevii   | 146.2             | 314.5              | 369.3              | 400.7               | 400.7                                                          | 701.8                                                          | 534.3              | 557.1                 | 404.8                                    |
| Mytesi     | 73.8              | 117.0              | 134.0              | 143.2               | 143.2                                                          | 250.8                                                          | 165.4              | 166.1                 | 161.6                                    |
| Northera   | 147.2             | 231.4              | 308.8              | 355.8               | 355.8                                                          | 623.1                                                          | 410.4              | 412.0                 | 339.4                                    |
| Nuplazid   | 515.0             | 1,163.2            | 2,062.7            | 2,787.9             | 3,757.6                                                        | 3,757.6                                                        | 4,279.9            | 4,503.7               | 3,548.8                                  |
| Nuzyra     | 461.8             | 1,906.4            | 2,708.9            | 3,215.8             | 3,215.8                                                        | 5,631.9                                                        | 4,185.2            | 4,488.7               | 1,888.1                                  |
| Ocaliva    | 351.4             | 724.5              | 932.0              | 1,062.6             | 1,860.9                                                        | 1,860.9                                                        | 1,404.9            | 1,465.8               | 1,053.9                                  |
| Orbactiv   | 155.9             | 259.1              | 308.5              | 336.1               | 336.1                                                          | 588.6                                                          | 394.3              | 397.1                 | 265.9                                    |
| Palynziq   | 843.2             | 2,075.4            | 3,242.1            | 4,104.7             | 7,165.7                                                        | 7,165.7                                                        | 5,925.0            | 6,262.5               | 4,032.3                                  |
| Praluent   | 1,245.1           | 2,606.2            | 3,126.0            | 3,429.6             | 3,429.6                                                        | 6,006.3                                                        | 4,583.5            | 4,771.0               | 2,862.4                                  |
| Rapivab    | 301.2             | 817.6              | 1,230.1            | 1,502.0             | 2,544.0                                                        | 2,544.0                                                        | 2,628.6            | 2,778.1               | 1,259.9                                  |
| Rhopressa  | 136.4             | 323.6              | 415.0              | 471.5               | 825.7                                                          | 825.7                                                          | 679.4              | 714.1                 | 335.2                                    |
| Rubraca    | 384.1             | 693.5              | 770.1              | 812.7               | 812.7                                                          | 1,423.3                                                        | 1,243.9            | 1,284.2               | 2,384.5                                  |



| Brand name | Actual R&D outlay | Wong et al. (0.0%) | Wong et al. (7.0%) | Wong et al. (10.5%) | Wong et al. (10.5% + pre-clinical excl. licensed) <sup>b</sup> | Wong et al. (10.5% + pre-clinical incl. licensed) <sup>c</sup> | Hay et al. (10.5%) | Thomas et al. (10.5%) | Therapeutic-area-specific rates (10.5%) |
|------------|-------------------|--------------------|--------------------|---------------------|----------------------------------------------------------------|----------------------------------------------------------------|--------------------|-----------------------|-----------------------------------------|
| Strensiq   | 160.0             | 384.4              | 418.8              | 436.7               | 436.7                                                          | 764.8                                                          | 885.1              | 932.8                 | 613.9                                   |
| Talzenna   | 588.7             | 1,047.7            | 1,284.1            | 1,425.4             | 2,335.4                                                        | 2,335.4                                                        | 2,044.7            | 2,100.6               | 3,684.6                                 |
| Tegsedi    | 188.3             | 365.2              | 450.2              | 500.5               | 876.5                                                          | 876.5                                                          | 605.0              | 623.2                 | 537.5                                   |
| Tibsovo    | 430.5             | 1,856.6            | 2,256.2            | 2,486.0             | 3,570.8                                                        | 3,570.8                                                        | 3,210.9            | 3,449.5               | 10,526.4                                |
| Trulance   | 348.1             | 688.2              | 887.4              | 1,009.2             | 1,751.1                                                        | 1,751.1                                                        | 1,595.1            | 1,661.6               | 1,217.6                                 |
| Tymlos     | 305.4             | 685.6              | 1,009.7            | 1,228.9             | 1,228.9                                                        | 2,152.2                                                        | 1,637.4            | 1,713.1               | 1,052.6                                 |
| Ultomiris  | 354.1             | 697.9              | 762.4              | 796.6               | 1,395.1                                                        | 1,395.1                                                        | 1,183.1            | 1,226.3               | 926.6                                   |
| Varubi     | 197.1             | 340.6              | 397.6              | 429.3               | 429.3                                                          | 751.8                                                          | 597.8              | 612.2                 | 517.1                                   |
| Veltassa   | 319.3             | 911.8              | 1,156.8            | 1,301.8             | 2,279.9                                                        | 2,279.9                                                        | 1,885.9            | 1,999.3               | 1,121.0                                 |
| Viberzi    | 343.7             | 721.9              | 888.3              | 985.3               | 985.3                                                          | 1,725.6                                                        | 1,474.1            | 1,537.8               | 1,113.5                                 |
| Viibryd    | 153.0             | 245.4              | 291.6              | 317.9               | 317.9                                                          | 556.7                                                          | 401.8              | 407.3                 | 383.1                                   |
| Vimizim    | 492.9             | 1,103.7            | 1,422.2            | 1,614.4             | 2,635.2                                                        | 2,635.2                                                        | 2,450.1            | 2,566.9               | 1,792.4                                 |
| Vitrakvi   | 119.2             | 380.3              | 433.1              | 461.9               | 808.9                                                          | 808.9                                                          | 849.2              | 902.6                 | 2,159.3                                 |
| Xerava     | 388.0             | 850.6              | 1,119.9            | 1,287.9             | 2,255.5                                                        | 2,255.5                                                        | 1,732.5            | 1,807.5               | 943.6                                   |
| Xtandi     | 193.5             | 407.5              | 484.9              | 530.1               | 530.1                                                          | 928.4                                                          | 798.5              | 833.1                 | 1,718.8                                 |
| Zaltrap    | 419.6             | 1,514.9            | 2,331.8            | 2,878.3             | 2,878.3                                                        | 5,040.8                                                        | 4,356.2            | 4,649.2               | 11,645.6                                |
| Zejula     | 400.0             | 665.0              | 756.9              | 807.0               | 807.0                                                          | 1,413.3                                                        | 1,021.1            | 1,035.9               | 1,591.5                                 |
| Zerbaxa    | 907.7             | 1,786.3            | 2,132.7            | 2,332.2             | 2,332.2                                                        | 4,084.4                                                        | 3,928.2            | 4,088.7               | 2,128.3                                 |

**Acronyms:** \$, dollars; R&D, research and development.

<sup>a</sup> Wong et al., Thomas et al., and Hay et al. refer to the sources of aggregate success rates. The therapeutic-area-specific rates were obtained from Wong et al. The percentages in parentheses refer to the cost of capital rate used in the calculations.

<sup>b</sup> This column includes adjustments for the potential underestimation of pre-clinical costs. No imputations were performed for products licensed

after clinical development had begun, since it was assumed that licensing fees and milestone payments reflected pre-clinical costs incurred by the company that sold the rights to the product. In such cases, the results for "Wong et al. (10.5%)" and "Wong et al. (10.5% + pre-clinical excl. licensed)" were identical.

<sup>c</sup> This column includes adjustments for the potential underestimation of pre-clinical costs but with imputations done for all products, including licensed agents. For non-licensed agents, the results shown for "Wong et al. (10.5% + pre-clinical excl. licensed)" and "Wong et al. (10.5% + pre-clinical incl. licensed)" were identical.
